# Supplementary material
Source: Springer Nature journal article supplement (https://www.springermedizin.de/resource/supplementary/12903_2008_97_MOESM3_ESM.pdf/9517330)
Supplement: MOESM3 [file 9517330]

| Description                              | Level  | Number of publications | References             |
|------------------------------------------|--------|------------------------|------------------------|
| Systematic reviews                       | I      | 0                      | No. of reviews: 0      |
| Randomized controlled trials (RCTs)      | II     | 9                      | No. of RCTs: 5         |
|                                          |        |                        | 1 [16] [17] [18]       |
|                                          |        |                        | 2 [10] [19] [20]       |
|                                          |        |                        | 3 [9]                  |
|                                          |        |                        | 4 [21]                 |
|                                          |        |                        | 5 [22]                 |
| Uncontrolled clinical trials             | III    | 4                      | No. of trials: 4       |
|                                          |        |                        | 1 [23]                 |
|                                          |        |                        | 2 [26]                 |
|                                          |        |                        | 3 [25]                 |
|                                          |        |                        | 4 [24]                 |
| Case reports                             | IV     | 11                     | No. of reports: 11     |
|                                          |        |                        | 1 [82]                 |
|                                          |        |                        | 2 [74] [83]            |
|                                          |        |                        | 3 [79]                 |
|                                          |        |                        | 4 [27]                 |
|                                          |        |                        | 5 [84]                 |
|                                          |        |                        | 6 [85]                 |
|                                          |        |                        | 7 [86]                 |
|                                          |        |                        | 8 [87]                 |
|                                          |        |                        | 9 [88]                 |
|                                          |        |                        | 10 [13]                |
|                                          |        |                        | 11 [2]                 |
| Narrative reviews (NR)                   | V      | 5                      | No. of NRs: 4          |
|                                          |        |                        | 1 [81] [89]            |
|                                          |        |                        | 2 [67]                 |
|                                          |        |                        | 3 [90]                 |
|                                          |        |                        | 4 [71]                 |
| Editorials                               | V      | 1                      | No. of editorials: 1   |
|                                          |        |                        | 1 [91]                 |
| NTI-specific reviews                     | V      | 17                     | No. of reviews: 17     |
|                                          |        |                        | 1 [92]                 |
|                                          |        |                        | 2 [93]                 |
|                                          |        |                        | 3 [94]                 |
|                                          |        |                        | 4 [95]                 |
|                                          |        |                        | 5 [8]                  |
|                                          |        |                        | 6 [96]                 |
|                                          |        |                        | 7 [13]                 |
|                                          |        |                        | 8 [77]                 |
|                                          |        |                        | 9 [97]                 |
|                                          |        |                        | 10 [98]                |
|                                          |        |                        | 11 [12]                |
|                                          |        |                        | 12 [99]                |
|                                          |        |                        | 13 [100]               |
|                                          |        |                        | 14 [101]               |
|                                          |        |                        | 15 [78]                |
|                                          |        |                        | 16 [80]                |
|                                          | 17 [7] |                        |                        |
| Expert commentary to a published article | V      | 3                      | No. of commentaries: 3 |
|                                          |        |                        | 1 [61]                 |
|                                          |        |                        | 2 [60]                 |
|                                          |        |                        | 3 [62]                 |
| Brief reference to NTI-tss in articles   | V      | 9                      | No. of articles: 9     |
|                                          |        |                        | 1 [68]                 |
|                                          |        |                        | 2 [69]                 |
|                                          |        |                        | 3 [70]                 |
|                                          |        |                        | 4 [11]                 |
|                                          |        |                        | 5 [65]                 |
|                                          |        |                        | 6 [102]                |
|                                          |        |                        | 7 [36]                 |
|                                          |        |                        | 8 [64]                 |
|                                          |        |                        | 9 [103]                |
| Interviews                               | V      | 8                      | No. of interviews: 7   |
|                                          |        |                        | 1 [104] [105]          |
|                                          |        |                        | 2 [106]                |
|                                          |        |                        | 3 [90]                 |
|                                          |        |                        | 4 [107]                |
|                                          |        |                        | 5 [108]                |
|                                          |        |                        | 6 [109]                |
|                                          |        |                        | 7 [110]                |
|                                          |        |                        | $\Sigma$ 68            |
